# Supplementary material for: Abatacept for GVHD prophylaxis can reduce racial disparities by abrogating the impact of mismatching in unrelated donor stem cell transplantation
Source: PubMed Central journal article supplement — Blood Adv. 2022 Jan 27;6(3):746–9. doi: 10.1182/bloodadvances.2021005208 (PMC8945296; doi:10.1182/bloodadvances.2021005208), 2022-01-27
Supplement: advancesADV2021005208-suppl1.pdf [file advancesADV2021005208-suppl1.pdf]

**Abatacept for GVHD prophylaxis can reduce racial disparities by abrogating the impact of mismatching in unrelated donor stem cell transplantation**

**Supplement Table 1.** Baseline Characteristics of 7/8 matched unrelated donor +Abatacept group (MMUD/aba) and 8/8 matched unrelated donor group (MUD/Placebo)

| <b>Characteristic</b>                 | <b>MMUD/aba<br/>N=43</b> | <b>MUD/Placebo<br/>N=69</b> | <b>P-value</b> |
|---------------------------------------|--------------------------|-----------------------------|----------------|
| <b>Mean Age at Transplant (years)</b> | 36.3 (SD 22.9)           | 40.4 (20.3)                 | 0.328          |
| <b>Race</b>                           |                          |                             |                |
| Caucasian                             | 30 (69.8%)               | 61 (88.4%)                  | 0.087          |
| African American                      | 7 (16.3%)                | 4 (5.8%)                    |                |
| Asian                                 | 2 (4.6%)                 | 2 (2.9%)                    |                |
| Unknown                               | 4 (9.3%)                 | 2 (2.9%)                    |                |
| <b>Performance Score</b>              |                          |                             |                |
| 90-100%                               | 32 (74.4%)               | 52 (75.4%)                  | 0.911          |
| <90%                                  | 11 (25.6%)               | 17 (24.6%)                  |                |
| <b>Diagnosis</b>                      |                          |                             |                |
| AML                                   | 15 (34.9%)               | 22 (31.9%)                  | 0.505          |
| ALL                                   | 9 (20.9%)                | 23 (33.3%)                  |                |
| CML/HL/Other                          | 8 (18.6%)                | 12 (17.4%)                  |                |
| MDS                                   | 11 (25.6%)               | 12 (17.4%)                  |                |
| <b>CIBMTR Disease Stage</b>           |                          |                             |                |
| Early                                 | 26 (60.5%)               | 36 (52.2%)                  | 0.690          |
| Intermediate                          | 10 (23.3%)               | 19 (27.5%)                  |                |
| Advanced                              | 7 (16.3%)                | 14 (20.3%)                  |                |
| <b>Conditioning Regimen</b>           |                          |                             |                |
| Busulfan/Fludarabine                  | 8 (18.6%)                | 2 (2.9%)                    | 0.035          |
| Busulfan/ Cyclophosphamide            | 13 (30.2%)               | 21 (30.4%)                  |                |
| Total Body                            | 11 (25.6%)               | 26 (37.7%)                  |                |
| Irradiation/Cyclophosphamide          |                          |                             |                |
| Fludarabine/Melphalan                 | 11 (25.6%)               | 20 (29%)                    |                |
| <b>Conditioning Intensity</b>         |                          |                             |                |
| Myeloablative                         | 33 (76.7%)               | 49 (71%)                    | 0.506          |
| Reduced Intensity                     | 10 (23.3%)               | 20 (29%)                    |                |
| <b>Graft Type</b>                     |                          |                             |                |
| Bone Marrow                           | 21 (48.8%)               | 26 (37.7%)                  | 0.245          |
| PBSC                                  | 22 (51.2%)               | 43 (62.3%)                  |                |

Abbreviations: AML, acute myelogenous leukemia; ALL, acute lymphoblastic leukemia; CML, chronic myelogenous leukemia; HL, Hodgkin lymphoma; MDS, myelodysplastic syndrome; PBSC, peripheral blood stem cells
